# Supplementary material
Source: Springer Nature journal article supplement (https://www.springermedizin.de/resource/supplementary/12874_2010_609_MOESM1_ESM.pdf/9432586)
Supplement: MOESM1 [file 9432586]

Weibull density

Weibull Density

$$f(t) = \frac{k}{\lambda} \left(\frac{t}{\lambda}\right)^{k-1} e^{-(t/\lambda)^k}, t \geq 0$$

- Prof no smoker
- Prof\*smoker
- Tech\*Smoker, Admin
- Admin\*Smoker

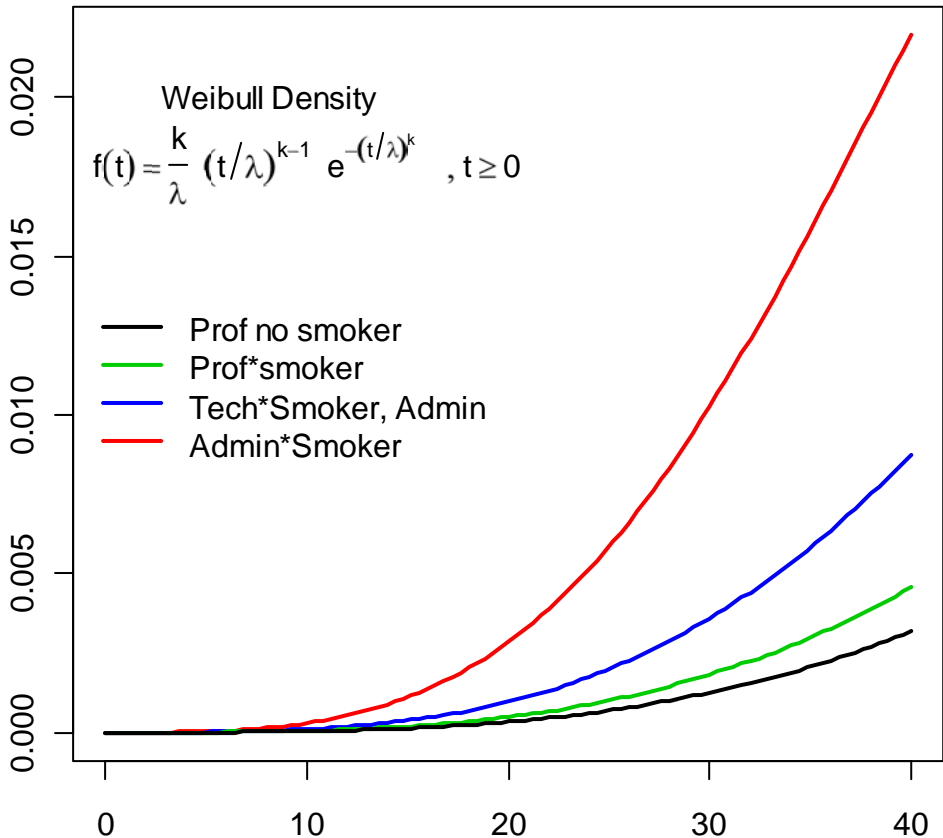

Years of follow-up
